# Supplementary material
Source: PubMed Central journal article supplement (PMC8570275)
Supplement: jb.00185-21-s0001.pdf [file jb.00185-21-s0001.pdf]

**Figure S1**

**A**

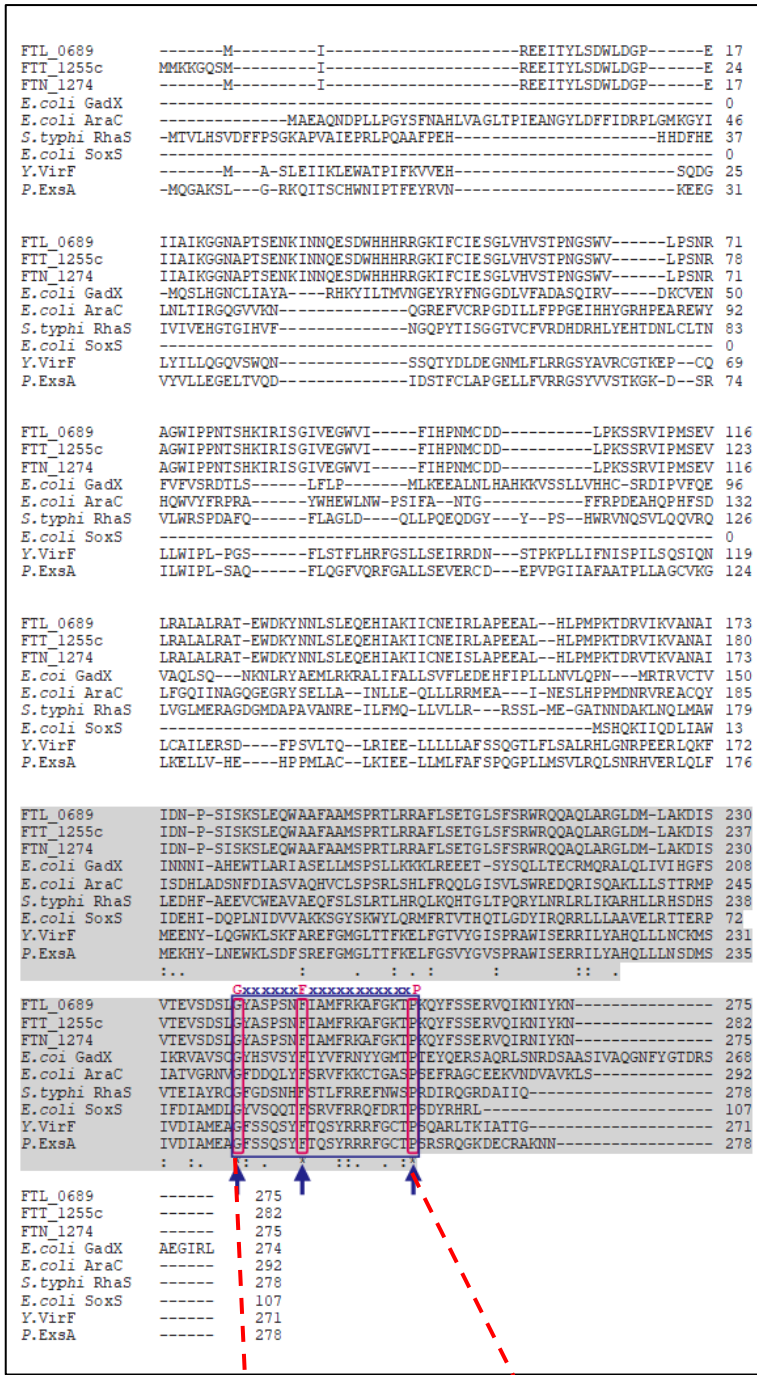

**C**

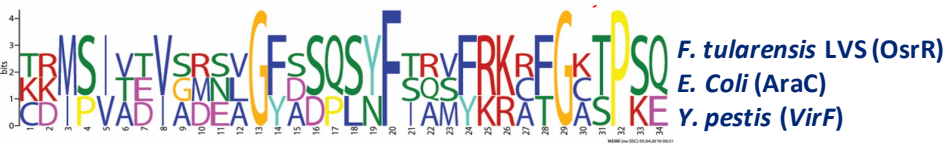

**B**

| Pathogen                                                | Locus tag  | Product                                                | % Identity |
|---------------------------------------------------------|------------|--------------------------------------------------------|------------|
| <i>F. tularensis</i> subsp. <i>tularensis</i> SchuS4    | FTT_1255c  | AraC family transcriptional regulator <i>osrR</i>      | 99.65%     |
| <i>F. novicida</i> U112                                 | FTN_1274   | AraC family Transcriptional regulator <i>osrR</i>      | 98.91%     |
| <i>E. coli</i> K-12                                     | U069_c0078 | AraC family putative transcriptional regulator protein | 33.33%     |
| <i>E. coli</i>                                          | N/A        | DNA-binding transcriptional regulator SoxS             | 27.27%     |
| <i>S. enterica</i> subsp. <i>enterica</i> serovar Typhi | CJP42_0176 | HTH-type transcriptional activator RhaS                | 26%        |
| <i>Y. enterocolitica</i>                                | RLY99535   | Virulence regulon transcriptional activator VirF       | 28%        |
| <i>P. aeruginosa</i> PAO1                               | PA1713     | transcriptional regulator ExsA                         | 20.46%     |

**D**

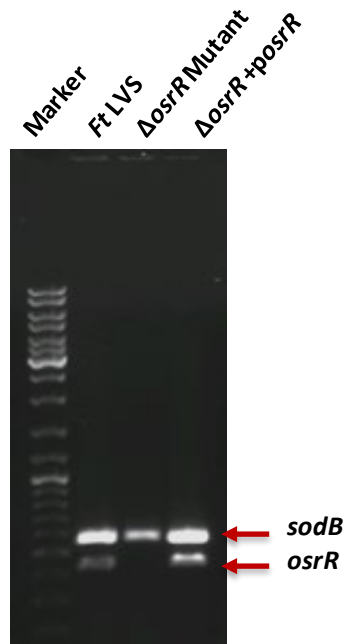

**Figure S1:** (A) Amino acid sequence alignment of the *osrR* (*FTL\_0689*) of *F. tularensis* (*Ft*) LVS and XylS/AraC family proteins from indicated bacterial pathogens. Multiple alignments were generated using Clustal W software. The C-terminal region (highlighted in grey) shows a conserved DNA binding motif GxxxxxxFxxxxxxxxxxxP. (B) Amino acid sequence homology of the AraC of indicated bacterial strains as compared to the OsrR of *Ft* LVS. (C) OsrR C-terminal region showing the conserved DNA binding motif (GxxxxxxFxxxxxxxxGxxP). (D) Confirmation of *osrR* gene deletion and transcomplementation by PCR. The wild type *Ft* LVS and *sodB* gene primers were used as positive and internal controls, respectively.

Figure S2

A

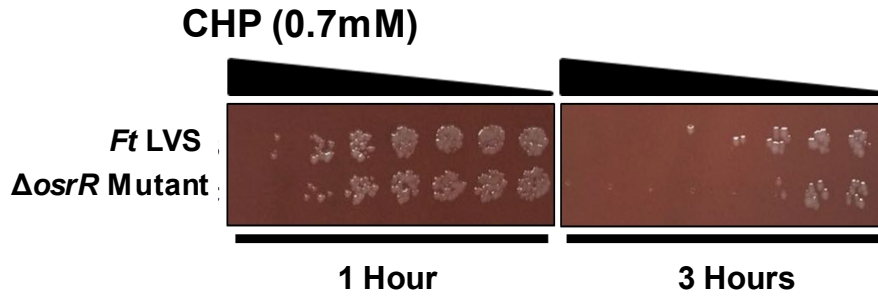

B

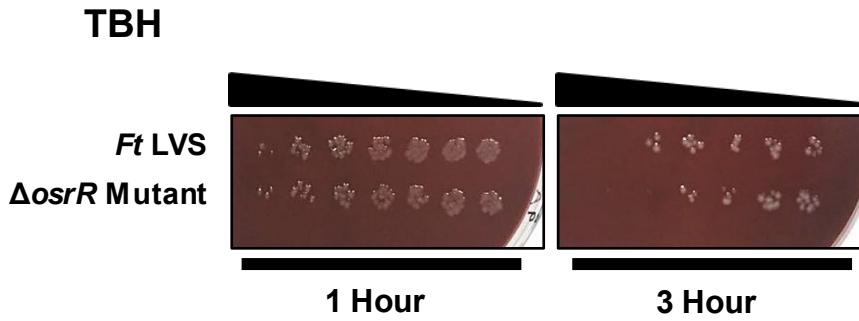

C

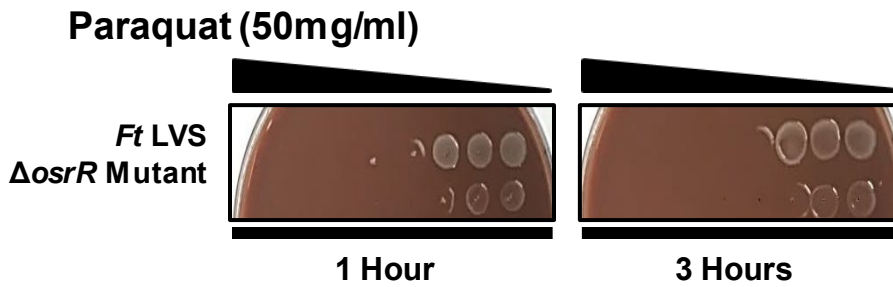

D

Menadione (1.25mM)

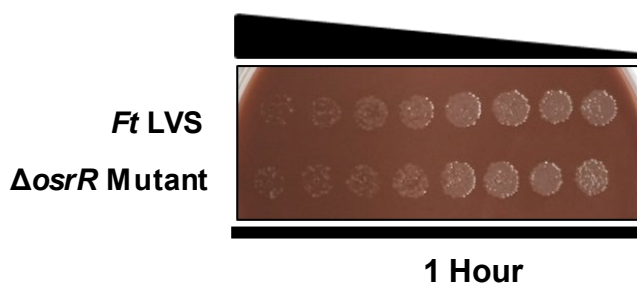

E

1.25mM Menadione

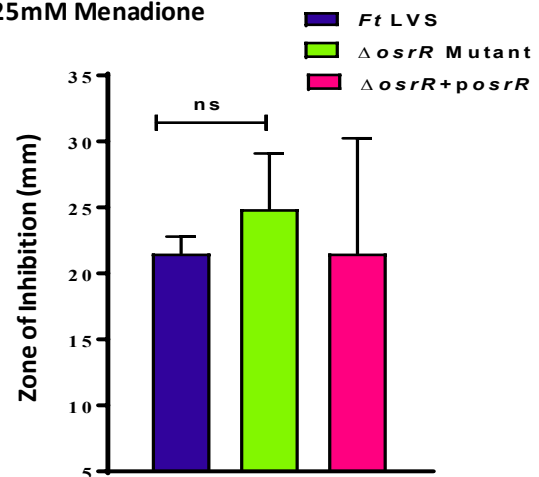

**Figure S2:** Wild type *F. tularensis* LVS (*Ft* LVS) and the  $\Delta osrR$  mutant were exposed to **(A)** Cumene hydroperoxide (CHP); **(B)** Tert-butyl hydroperoxide (TBH); **(C)** Paraquat; and **(D)** Menadione diluted two-fold with a starting indicated concentrations for one hour and three hours in a spot assay. **(E)** The sensitivities of the wild type *F. tularensis* LVS (*Ft* LVS), the  $\Delta osrR$  mutant and the transcomplemented strain ( $\Delta osrR+posrR$ ) to menadione was determined by disc diffusion assay and the zone of inhibition around the discs impregnated with the indicated concentration of menadione was measured. The results shown in A, B, C and D are representative of two independent experiments. The data shown in E are representative of two independent experiments, each conducted with three technical replicates.

# Figure S3

## A

| Gene        | baseMean | log2FoldChange | lfcSE | stat  | pvalue   | padj     | Old locus | Product                                                                                                                 | Pathway              |
|-------------|----------|----------------|-------|-------|----------|----------|-----------|-------------------------------------------------------------------------------------------------------------------------|----------------------|
| FTL_RS03610 | 14.29    | -0.67          | 0.15  | -4.42 | 9.76E-06 | 1.95E-02 | FTL_0689  | AraC family transcriptional regulator                                                                                   | Transcription        |
| FTL_RS00320 | 33.74    | -0.41          | 0.17  | -2.47 | 1.35E-02 | 9.99E-01 | FTL_0061  | FUSC family protein                                                                                                     | Transport            |
| FTL_RS00345 | 131.18   | -0.34          | 0.16  | -2.09 | 3.64E-02 | 9.99E-01 | FTL_0069  | outer membrane protein assembly factor BamE                                                                             | Transport            |
| FTL_RS00390 | 58.87    | -0.33          | 0.16  | -2.05 | 4.03E-02 | 9.99E-01 | FTL_0078  | Bifunctional diaminohydroxyphosphoribosylaminopyrimidine deaminase/5-amino-(5-phosphoribosylamino)uracil reductase RibD | Metabolism           |
| FTL_RS00520 | 8.44     | -0.3           | 0.13  | -2.25 | 2.45E-02 | 9.99E-01 | FTL_0106  | nicotinamide ribonucleoside (NR) uptake permease (PnuC) family protein                                                  | Transport            |
| FTL_RS01090 | 10.05    | -0.31          | 0.14  | -2.2  | 2.78E-02 | 9.99E-01 | FTL_0205  | tetratricopeptide repeat protein                                                                                        | Stress response      |
| FTL_RS01120 | 56.94    | -0.38          | 0.17  | -2.27 | 2.34E-02 | 9.99E-01 | FTL_0211  | hypothetical protein                                                                                                    | Hypothetical Protein |
| FTL_RS01880 | 37.29    | -0.4           | 0.17  | -2.41 | 1.58E-02 | 9.99E-01 | N/A       | hypothetical protein                                                                                                    | Hypothetical Protein |
| FTL_RS02295 | 54.81    | -0.48          | 0.17  | -2.87 | 4.07E-03 | 9.99E-01 | FTL_0443  | MFS transporter                                                                                                         | Transport            |
| FTL_RS02905 | 99.44    | -0.35          | 0.16  | -2.12 | 3.37E-02 | 9.99E-01 | FTL_0555  | tRNA pseudouridine(55) synthase TruB                                                                                    | Translation          |
| FTL_RS02910 | 444.76   | -0.34          | 0.15  | -2.18 | 2.96E-02 | 9.99E-01 | FTL_0556  | ribonuclease R                                                                                                          | Transcription        |
| FTL_RS05040 | 931.64   | -0.28          | 0.13  | -2.19 | 2.88E-02 | 9.99E-01 | FTL_0986  | ribonucleotide-diphosphate reductase subunit alpha                                                                      | Replication          |
| FTL_RS05695 | 17.35    | -0.33          | 0.16  | -2.1  | 3.57E-02 | 9.99E-01 | FTL_1121  | hypothetical protein                                                                                                    | Hypothetical Protein |
| FTL_RS06425 | 55.15    | -0.35          | 0.17  | -2.13 | 3.28E-02 | 9.99E-01 | N/A       | carbon-nitrogen hydrolase                                                                                               | Metabolism           |
| FTL_RS06605 | 283      | -0.33          | 0.16  | -2.03 | 4.20E-02 | 9.99E-01 | FTL_1294  | short-chain dehydrogenase/reductase                                                                                     | Metabolism           |
| FTL_RS07875 | 39.87    | -0.33          | 0.17  | -1.98 | 4.77E-02 | 9.99E-01 | FTL_1540  | cell division protein FtsL                                                                                              | Replication          |
| FTL_RS07980 | 10.97    | -0.32          | 0.14  | -2.27 | 2.32E-02 | 9.99E-01 | N/A       | asparaginase                                                                                                            | Metabolism           |
| FTL_RS08090 | 25.08    | -0.43          | 0.16  | -2.61 | 9.01E-03 | 9.99E-01 | FTL_1587  | EF-P lysine aminoacylase GenX                                                                                           | Translation          |
| FTL_RS08465 | 27.14    | -0.42          | 0.17  | -2.52 | 1.17E-02 | 9.99E-01 | FTL_1661  | nucleoside permease                                                                                                     | Transport            |

## B

| Gene        | baseMean | log2FoldChange | lfcSE | stat | pvalue   | padj     | Old locus | Product                                                                                          | Pathway              |
|-------------|----------|----------------|-------|------|----------|----------|-----------|--------------------------------------------------------------------------------------------------|----------------------|
| FTL_RS00470 | 2930.62  | 0.27           | 0.13  | 1.98 | 4.72E-02 | 9.99E-01 | FTL_0094  | ATP-dependent chaperone ClpB                                                                     | Stress response      |
| FTL_RS01035 | 83.16    | 0.36           | 0.16  | 2.25 | 2.46E-02 | 9.99E-01 | FTL_0194  | cytochrome o ubiquinol oxidase subunit IV                                                        | Metabolism           |
| FTL_RS01485 | 1105.61  | 0.3            | 0.13  | 2.34 | 1.95E-02 | 9.99E-01 | FTL_0281  | molecular chaperone DnaJ                                                                         | Stress response      |
| FTL_RS10075 | 617.39   | 0.4            | 0.13  | 3    | 2.73E-03 | 9.99E-01 | N/A       | bacterial RNase P                                                                                | Translation          |
| FTL_RS10065 | 6619.12  | 0.37           | 0.14  | 2.72 | 6.58E-03 | 9.99E-01 | N/A       | RNA component of RNaseP                                                                          | Translation          |
| FTL_RS01505 | 2724.23  | 0.39           | 0.15  | 2.6  | 9.25E-03 | 9.99E-01 | FTL_0285  | Bifunctional (p)ppGpp synthetase/guanosine-3',5'-bis(diphosphate) 3'-pyrophosphohydrolase        | Stress response      |
| FTL_RS02050 | 242.13   | 0.32           | 0.14  | 2.19 | 2.85E-02 | 9.99E-01 | FTL_0396  | phosphoribosylamine--glycine ligase                                                              | Metabolism           |
| FTL_RS03180 | 79.79    | 0.32           | 0.16  | 2.02 | 4.32E-02 | 9.99E-01 | FTL_0609  | phosphomannomutase                                                                               | Metabolism           |
| FTL_RS04205 | 20.62    | 0.35           | 0.16  | 2.14 | 3.23E-02 | 9.99E-01 | N/A       | KR domain-containing protein                                                                     | Metabolism           |
| FTL_RS05345 | 55.93    | 0.34           | 0.17  | 2.06 | 3.99E-02 | 9.99E-01 | FTL_1047  | 30S ribosomal protein S21                                                                        | Translation          |
| FTL_RS07065 | 30.58    | 0.47           | 0.17  | 2.81 | 4.92E-03 | 9.99E-01 | N/A       | hypothetical protein                                                                             | Hypothetical Protein |
| FTL_RS06915 | 46.03    | 0.33           | 0.17  | 1.96 | 5.00E-02 | 9.99E-01 | FTL_1357  | UTP--glucose-1-phosphate uridylyltransferase                                                     | Metabolism           |
| FTL_RS08085 | 15.25    | 0.33           | 0.16  | 2.09 | 3.65E-02 | 9.99E-01 | FTL_1586  | biotin--[acetyl-CoA-carboxylase] ligase                                                          | Metabolism           |
| FTL_RS08730 | 7562.92  | 0.27           | 0.12  | 2.19 | 2.85E-02 | 9.99E-01 | FTL_1714  | molecular chaperone GroEL                                                                        | Stress response      |
| FTL_RS08735 | 1597.28  | 0.29           | 0.13  | 2.22 | 2.65E-02 | 9.99E-01 | FTL_1715  | molecular chaperone GroES                                                                        | Stress response      |
| FTL_RS09410 | 67.12    | 0.34           | 0.16  | 2.08 | 3.77E-02 | 9.99E-01 | FTL_1840  | hypothetical protein                                                                             | Hypothetical Protein |
| FTL_RS09725 | 72.44    | 0.33           | 0.16  | 2.04 | 4.10E-02 | 9.99E-01 | FTL_1911  | nucleoside deaminase                                                                             | Translation          |
| FTL_RS09945 | 1524.81  | 0.3            | 0.13  | 2.4  | 1.62E-02 | 9.99E-01 | FTL_1957  | Hsp20/alpha crystallin family protein                                                            | Stress response      |
| FTL_RS09950 | 806.88   | 0.3            | 0.14  | 2.16 | 3.07E-02 | 9.99E-01 | FTL_1958  | bifunctional indole-3-glycerol-phosphate synthase TrpC/phosphoribosylanthranilate isomerase TrpF | Translation          |

**Figure S3:** Expression profile of  $\Delta osrR$  mutant as compared to the wild type *F. tularensis* in the absence of oxidative stress. (A) The expression profile of down regulated and (B) up regulated genes in the  $\Delta osrR$  mutant.

**Figure S4**

| Gene        | baseMean | log2FoldChange | lfcSE | stat  | pvalue   | padj     | Old locus | Product                                                                      | Function             |
|-------------|----------|----------------|-------|-------|----------|----------|-----------|------------------------------------------------------------------------------|----------------------|
| FTL_RS01645 | 205.1    | -0.53          | 0.18  | -3    | 2.70E-03 | 1.18E-01 | FTL_0310  | pyruvate dehydrogenase complex dihydrolipoyllysine-residue acetyltransferase | Metabolism           |
| FTL_RS01650 | 228.55   | -0.88          | 0.18  | -4.86 | 1.19E-06 | 6.03E-04 | FTL_0311  | dihydrolipoyl dehydrogenase                                                  | Metabolism           |
| FTL_RS03505 | 168.4    | -0.85          | 0.18  | -4.61 | 3.96E-06 | 7.46E-04 | FTL_0671  | pantothenate kinase                                                          | Metabolism           |
| FTL_RS03510 | 52.61    | -0.61          | 0.21  | -2.9  | 3.78E-03 | NA       | FTL_0672  | aspartate 1-decarboxylase                                                    | Metabolism           |
| FTL_RS03515 | 486.39   | -0.77          | 0.16  | -4.74 | 2.13E-06 | 6.03E-04 | FTL_0673  | pantothenate synthetase                                                      | Metabolism           |
| FTL_RS03520 | 384.19   | -0.49          | 0.17  | -2.84 | 4.46E-03 | 1.46E-01 | FTL_0674  | 3-methyl-2-oxobutanoate hydroxymethyltransferase                             | Metabolism           |
| FTL_RS01350 | 298.56   | -0.66          | 0.17  | -4.01 | 5.99E-05 | 7.93E-03 | FTL_0256  | preprotein translocase subunit SecY                                          | Transport            |
| FTL_RS01335 | 411.81   | -0.5           | 0.16  | -3.11 | 1.87E-03 | 9.62E-02 | FTL_0253  | 30S ribosomal protein S5                                                     | Translation          |
| FTL_RS09120 | 254.01   | -0.46          | 0.17  | -2.67 | 7.53E-03 | 1.85E-01 | FTL_1783  | dihydrolipoyllysine-residue succinyltransferase                              | Transcription        |
| FTL_RS09125 | 353.5    | -0.65          | 0.16  | -3.98 | 7.02E-05 | 7.93E-03 | FTL_1784  | 2-oxoglutarate dehydrogenase E1 component                                    | Metabolism           |
| FTL_RS05840 | 284.77   | -0.33          | 0.17  | -2.01 | 4.47E-02 | 4.73E-01 | FTL_1147  | phosphoglycerate kinase                                                      | Metabolism           |
| FTL_RS05845 | 248.88   | -0.47          | 0.18  | -2.63 | 8.47E-03 | 1.91E-01 | FTL_1148  | pyruvate kinase                                                              | Metabolism           |
| FTL_RS05850 | 115.76   | -0.75          | 0.2   | -3.86 | 1.11E-04 | 1.05E-02 | FTL_1149  | fructose-bisphosphate aldolase class II                                      | Metabolism           |
| FTL_RS09330 | 50.37    | -0.61          | 0.22  | -2.85 | 4.32E-03 | NA       | FTL_1823  | NADH-quinone oxidoreductase subunit H                                        | Metabolism           |
| FTL_RS09335 | 191.8    | -0.4           | 0.18  | -2.16 | 3.05E-02 | 3.83E-01 | FTL_1824  | NADH-quinone oxidoreductase subunit G                                        | Metabolism           |
| FTL_RS09340 | 219.1    | -0.61          | 0.17  | -3.49 | 4.82E-04 | 3.89E-02 | FTL_1825  | NADH-quinone oxidoreductase subunit F                                        | Metabolism           |
| FTL_RS03460 | 158.86   | -0.64          | 0.2   | -3.17 | 1.51E-03 | 9.08E-02 | FTL_0662  | helix-turn-helix domain-containing protein                                   | Transcription        |
| FTL_RS06610 | 228.05   | -0.64          | 0.2   | -3.15 | 1.61E-03 | 9.08E-02 |           | amino acid transporter                                                       | Transport            |
| FTL_RS08895 | 366.42   | -0.51          | 0.17  | -3.03 | 2.41E-03 | 1.14E-01 | FTL_1743  | DNA-directed RNA polymerase subunit beta'                                    | Transcription        |
| FTL_RS08900 | 704.89   | -0.34          | 0.17  | -1.99 | 4.64E-02 | 4.73E-01 | FTL_1744  | DNA-directed RNA polymerase subunit beta                                     | Transcription        |
| FTL_RS01275 | 160      | -0.45          | 0.18  | -2.59 | 9.60E-03 | 1.96E-01 | FTL_0241  | 50S ribosomal protein L22                                                    | Translation          |
| FTL_RS01280 | 197.66   | -0.51          | 0.18  | -2.89 | 3.88E-03 | 1.38E-01 | FTL_0242  | 30S ribosomal protein S3                                                     | Translation          |
| FTL_RS01285 | 147.97   | -0.49          | 0.17  | -2.83 | 4.65E-03 | 1.46E-01 | FTL_0243  | 50S ribosomal protein L16                                                    | Translation          |
| FTL_RS01290 | 70.44    | -0.45          | 0.2   | -2.31 | 2.11E-02 | NA       | FTL_0244  | 50S ribosomal protein L29                                                    | Translation          |
| FTL_RS01255 | 238.45   | -0.46          | 0.18  | -2.58 | 1.00E-02 | 1.96E-01 | FTL_0237  | 50S ribosomal protein L4                                                     | Translation          |
| FTL_RS01260 | 86.86    | -0.41          | 0.2   | -2.07 | 3.84E-02 | NA       | FTL_0238  | 50S ribosomal protein L23                                                    | Translation          |
| FTL_RS01270 | 115.52   | -0.39          | 0.18  | -2.16 | 3.04E-02 | 3.83E-01 | FTL_0240  | 30S ribosomal protein S19                                                    | Translation          |
| FTL_RS02205 | 163.94   | -0.51          | 0.17  | -2.9  | 3.73E-03 | 1.38E-01 | FTL_0426  | type I DNA topoisomerase                                                     | Replication          |
| FTL_RS09190 | 100.84   | -0.55          | 0.19  | -2.88 | 3.92E-03 | 1.38E-01 | FTL_1796  | ATP synthase subunit gamma                                                   | Metabolism           |
| FTL_RS09185 | 174.03   | -0.48          | 0.17  | -2.81 | 4.98E-03 | 1.48E-01 | FTL_1795  | ATP synthase subunit beta                                                    | Metabolism           |
| FTL_RS04390 | 852.67   | -0.55          | 0.2   | -2.74 | 6.23E-03 | 1.60E-01 | FTL_0852  | 3-phosphoshikimate 1-carboxyvinyltransferase                                 | Metabolism           |
| FTL_RS04395 | 199.42   | -0.52          | 0.2   | -2.53 | 1.15E-02 | 2.03E-01 | FTL_0853  | hypothetical protein                                                         | Hypothetical protein |
| FTL_RS04400 | 216.32   | -0.48          | 0.2   | -2.41 | 1.61E-02 | 2.40E-01 | FTL_0854  | ribonuclease HI                                                              | Replication          |
| FTL_RS00575 | 269.73   | -0.49          | 0.19  | -2.57 | 1.03E-02 | 1.96E-01 | FTL_0116  | hypothetical protein                                                         | Hypothetical protein |
| FTL_RS00580 | 22.68    | -0.57          | 0.22  | -2.57 | 1.01E-02 | NA       | FTL_0117  | hypothetical protein                                                         | Hypothetical protein |
| FTL_RS05915 | 269.73   | -0.49          | 0.19  | -2.57 | 1.03E-02 | 1.96E-01 | FTL_1162  | hypothetical protein                                                         | Hypothetical protein |
| FTL_RS05920 | 22.68    | -0.57          | 0.22  | -2.57 | 1.01E-02 | NA       | FTL_1163  | hypothetical protein                                                         | Hypothetical protein |
| FTL_RS06055 | 203.72   | -0.51          | 0.21  | -2.49 | 1.28E-02 | 2.12E-01 | FTL_1183  | sodium:solute symporter                                                      | Transport            |
| FTL_RS02520 | 187.98   | -0.42          | 0.17  | -2.47 | 1.35E-02 | 2.18E-01 | FTL_0480  | glycine dehydrogenase (aminomethyl-transferring)                             | Metabolism           |
| FTL_RS04690 | 174.23   | -0.43          | 0.18  | -2.43 | 1.51E-02 | 2.30E-01 | FTL_0916  | ketol-acid reductoisomerase                                                  | Metabolism           |
| FTL_RS01170 | 109.9    | -0.39          | 0.19  | -2.07 | 3.81E-02 | 4.44E-01 | FTL_0221  | APC family permease                                                          | Metabolism           |
| FTL_RS06605 | 245.75   | -0.4           | 0.2   | -2.01 | 4.48E-02 | 4.73E-01 | FTL_1294  | short-chain dehydrogenase/reductase                                          | Metabolism           |
| FTL_RS03560 | 69.37    | -0.51          | 0.2   | -2.48 | 1.32E-02 | NA       | FTL_0681  | polyamine ABC transporter ATP-binding protein                                | Transport            |
| FTL_RS03610 | 9.94     | -1.08          | 0.21  | -5.17 | 2.29E-07 | NA       | FTL_0689  | AraC family transcriptional regulator                                        | Transcription        |
| FTL_RS03730 | 40.05    | -0.69          | 0.22  | -3.21 | 1.32E-03 | NA       | FTL_0714  | phosphoglycerate dehydrogenase                                               | Metabolism           |
| FTL_RS04310 | 66.19    | -0.57          | 0.2   | -2.8  | 5.15E-03 | NA       | FTL_0837  | MetQ/NlpA family lipoprotein                                                 | Transport            |
| FTL_RS04845 | 3.83     | -0.36          | 0.16  | -2.17 | 2.98E-02 | NA       | FTL_0947  | MFS transporter                                                              | Transport            |
| FTL_RS06245 | 21.98    | -0.47          | 0.22  | -2.13 | 3.32E-02 | NA       | FTL_1221  | hypothetical protein                                                         | Hypothetical protein |
| FTL_RS06305 | 12.04    | -0.53          | 0.22  | -2.47 | 1.37E-02 | NA       | FTL_1234  | hypothetical protein                                                         | Hypothetical protein |
| FTL_RS06435 | 17.74    | -0.51          | 0.22  | -2.31 | 2.07E-02 | NA       |           | MFS transporter                                                              | Transport            |
| FTL_RS06440 | 13.13    | -0.45          | 0.22  | -2.08 | 3.72E-02 | NA       |           | hypothetical protein                                                         | Hypothetical protein |
| FTL_RS06615 | 19.92    | -0.56          | 0.22  | -2.54 | 1.12E-02 | NA       | FTL_1297  | hypothetical protein                                                         | Hypothetical protein |
| FTL_RS10045 | 67.36    | -0.48          | 0.21  | -2.23 | 2.57E-02 | NA       | FTL_1368  | hypothetical protein                                                         | Hypothetical protein |
| FTL_RS08465 | 15.13    | -0.55          | 0.22  | -2.51 | 1.22E-02 | NA       | FTL_1661  | nucleoside permease                                                          | Transport            |

**Figure S4:** The expression profile of down regulated genes in the  $\Delta osrR$  mutant as compared to the wild type *F. tularensis* in the presence of oxidative stress induced by menadione.



# Figure S5

| Gene        | baseMean | log2FoldChange | lfcSE | stat | pvalue   | padj     | Old locus | Product                                                                                  | Pathway              |
|-------------|----------|----------------|-------|------|----------|----------|-----------|------------------------------------------------------------------------------------------|----------------------|
| FTL_RS05365 | 316.56   | 0.56           | 0.16  | 3.39 | 7.04E-04 | 4.97E-02 | FTL_1051  | NAD(P)/FAD-dependent oxidoreductase                                                      | Metabolism           |
| FTL_RS09215 | 124.12   | 0.39           | 0.19  | 2.06 | 3.95E-02 | 4.46E-01 | FTL_1801  | FOF1 ATP synthase subunit A                                                              | Metabolism           |
| FTL_RS00130 | 1120.2   | 0.53           | 0.19  | 2.78 | 5.43E-03 | 1.49E-01 | FTL_0024  | serine/threonine transporter                                                             | Transport            |
| FTL_RS04110 | 132.05   | 0.52           | 0.19  | 2.77 | 5.56E-03 | 1.49E-01 |           | hypothetical protein                                                                     | Hypothetical protein |
| FTL_RS04920 | 416.96   | 0.41           | 0.16  | 2.66 | 7.89E-03 | 1.86E-01 | FTL_0964  | HslU--HslV peptidase ATPase subunit                                                      | Stress Response      |
| FTL_RS01485 | 563.33   | 0.39           | 0.15  | 2.56 | 1.04E-02 | 1.96E-01 | FTL_0281  | molecular chaperone DnaJ                                                                 | Stress Response      |
| FTL_RS05820 | 302.53   | 0.41           | 0.16  | 2.53 | 1.15E-02 | 2.03E-01 | FTL_1143  | SOS ribosomal protein L32                                                                | Translation          |
| FTL_RS01505 | 2259.55  | 0.37           | 0.15  | 2.5  | 1.25E-02 | 2.12E-01 | FTL_0285  | bifunctional (p)ppGpp synthetase/guanosine-3',5'-bis(diphosphate)3'-pyrophosphohydrolase | Stress Response      |
| FTL_RS02360 | 254.92   | 0.45           | 0.19  | 2.44 | 1.46E-02 | 2.30E-01 | FTL_0449  | hypothetical protein                                                                     | Hypothetical protein |
| FTL_RS06090 | 211.11   | 0.44           | 0.18  | 2.39 | 1.69E-02 | 2.45E-01 | FTL_1190  | nucleotide exchange factor GrpE                                                          | Stress Response      |
| FTL_RS06100 | 553.37   | 0.31           | 0.15  | 2.09 | 3.68E-02 | 4.42E-01 | FTL_1192  | molecular chaperone DnaJ                                                                 | Stress Response      |
| FTL_RS04450 | 102.64   | 0.42           | 0.18  | 2.3  | 2.17E-02 | 3.06E-01 | FTL_0864  | SIS domain-containing protein                                                            | Transport            |
| FTL_RS01410 | 2338.4   | 0.37           | 0.17  | 2.22 | 2.61E-02 | 3.52E-01 | FTL_0267  | molecular chaperone HtpG                                                                 | Stress Response      |
| FTL_RS09265 | 411.73   | 0.36           | 0.16  | 2.22 | 2.62E-02 | 3.52E-01 | FTL_1811  | ribosome maturation factor                                                               | Translation          |
| FTL_RS10065 | 5687.52  | 0.34           | 0.15  | 2.18 | 2.90E-02 | 3.81E-01 |           | RNA component of RNaseP                                                                  | Translation          |
| FTL_RS08735 | 1054.01  | 0.36           | 0.17  | 2.16 | 3.12E-02 | 3.83E-01 | FTL_1715  | molecular chaperone GroES                                                                | Stress Response      |
| FTL_RS00140 | 110.82   | 0.38           | 0.18  | 2.07 | 3.85E-02 | 4.44E-01 |           | 3-hydroxyisobutyrate dehydrogenase                                                       | Metabolism           |
| FTL_RS03780 | 117.59   | 0.36           | 0.18  | 1.98 | 4.71E-02 | 4.73E-01 | FTL_0724  | S-formyltetrahydrofolate cyclo-ligase                                                    | Metabolism           |
| FTL_RS03820 | 206.83   | 0.36           | 0.18  | 1.97 | 4.84E-02 | 4.73E-01 | FTL_0732  | lactoylglutathione lyase                                                                 | Metabolism           |
| FTL_RS04585 | 1102.72  | 0.29           | 0.15  | 1.99 | 4.65E-02 | 4.73E-01 | FTL_0891  | trigger factor                                                                           | Stress Response      |
| FTL_RS04590 | 243.44   | 0.33           | 0.17  | 1.98 | 4.75E-02 | 4.73E-01 | FTL_0892  | ATP-dependent Clp protease proteolytic subunit                                           | Stress Response      |
| FTL_RS08215 | 118.52   | 0.37           | 0.19  | 1.97 | 4.87E-02 | 4.73E-01 | FTL_1611  | glycosyltransferase                                                                      | Metabolism           |
| FTL_RS02740 | 81.17    | 0.48           | 0.2   | 2.36 | 1.81E-02 | NA       | FTL_0523  | hypothetical protein                                                                     | Hypothetical protein |
| FTL_RS03255 | 29.61    | 0.45           | 0.22  | 2.06 | 3.95E-02 | NA       | FTL_0623  | ABC transporter ATP-binding protein                                                      | Transport            |
| FTL_RS03715 | 9.93     | 0.42           | 0.21  | 2    | 4.56E-02 | NA       | FTL_0710  | choloylglycine hydrolase                                                                 | Metabolism           |
| FTL_RS04215 | 45.86    | 0.44           | 0.21  | 2.07 | 3.80E-02 | NA       | FTL_0814  | photosystem reaction center subunit H                                                    | Transport            |
| FTL_RS04430 | 23.1     | 0.45           | 0.22  | 2.05 | 4.06E-02 | NA       | FTL_0860  | hypothetical protein                                                                     | Hypothetical protein |
| FTL_RS04660 | 11.84    | 0.45           | 0.22  | 2.06 | 3.91E-02 | NA       |           | threonine synthase                                                                       | Metabolism           |
| FTL_RS05685 | 6.82     | 0.55           | 0.19  | 2.84 | 4.46E-03 | NA       | FTL_1120  | hypothetical protein                                                                     | Hypothetical protein |
| FTL_RS08415 | 2.16     | 0.27           | 0.13  | 2.13 | 3.35E-02 | NA       | FTL_1643  | peptide ABC transporter permease                                                         | Transport            |
| FTL_RS09825 | 64.32    | 0.44           | 0.2   | 2.18 | 2.91E-02 | NA       | FTL_1931  | hypoxanthine phosphoribosyltransferase                                                   | Metabolism           |

**Figure S5:** Expression profile of up regulated genes in the  $\Delta osrR$  mutant as compared to the wild type *F. tularensis* LVS in the presence of oxidative stress induced by menadione.
